# Supplementary material for: Incorporating Ni-MOF structure with polypyrrole: enhanced capacitive behavior as electrode material for supercapacitor
Source: Royal Society of Chemistry journal article supplement (doi:10.1039/c9ra10467d), 2020-01-01
Supplement: c9ra10467d1.pdf [file c9ra10467d1.pdf]

## Supplementary Information for

### Incorporating Ni-MOF structure with polypyrrole: Enhanced capacitive behavior as electrode material

Baoling Wang<sup>a</sup>, Wei Li<sup>a</sup>, Zhelin Liu<sup>a,\*</sup>, Yujie Duan<sup>a</sup>, Bo Zhao<sup>a,b</sup>, Yin Wang<sup>b</sup>, Jinghai

Liu<sup>b</sup>

<sup>a</sup> School of Chemistry & Environmental Engineering, Changchun University of Science and Technology, Changchun, Jilin 130022, P.R. China

<sup>b</sup> Inner Mongolia Key Laboratory of Carbon Nanomaterials, College of Chemistry and Chemical Engineering, Nano Innovation Institute, Inner Mongolia University for Nationalities, Tongliao, Inner Mongolia 028000, China

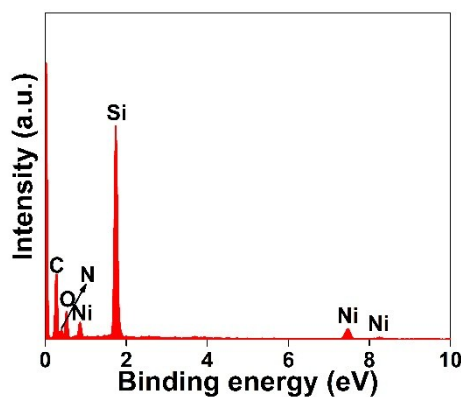

Fig. S1 EDS image of PPy-MOF composite.

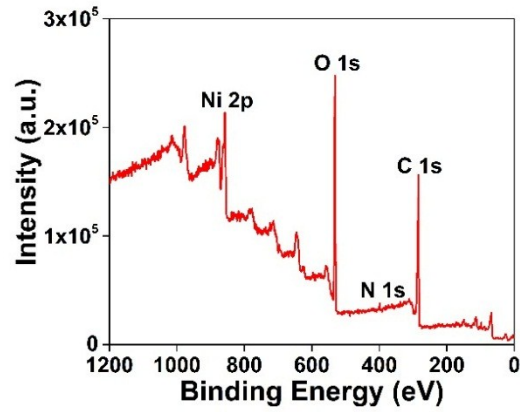

Fig. S2 XPS survey spectrum of PPy-MOF.

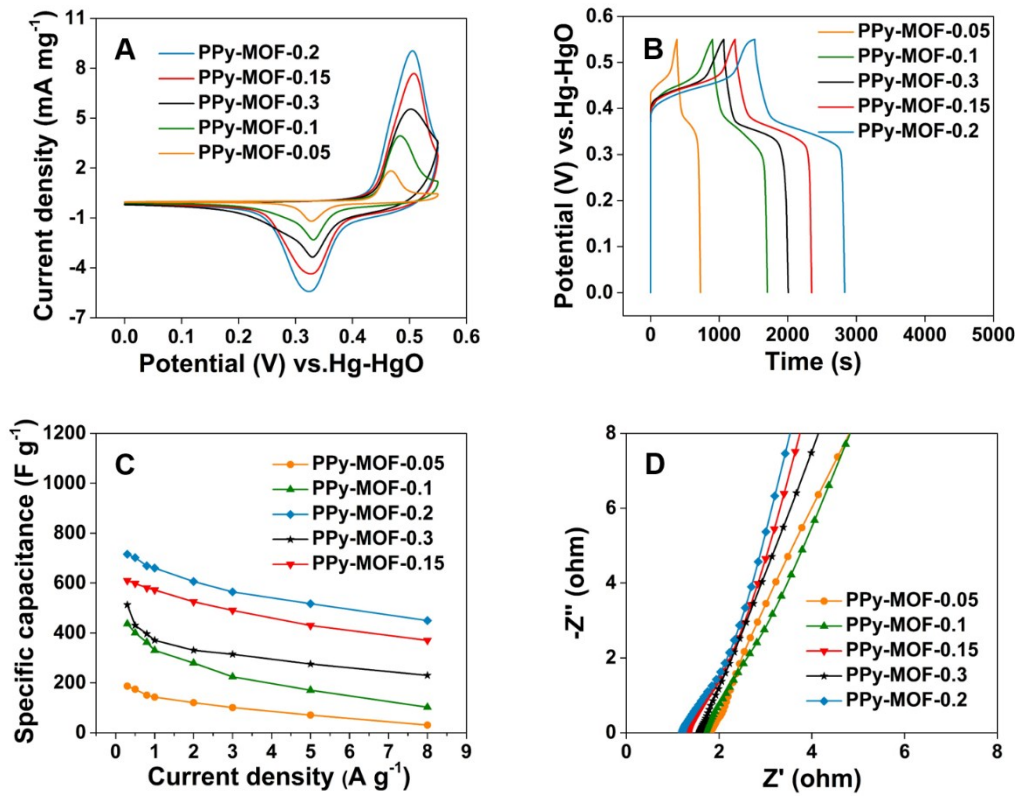

Fig. S3 (A) CV and (B) GCD curves of PPy-MOF- $x$  composites at the scan rate of  $2 \text{ mV s}^{-1}$  (A) and at the current density of  $0.3 \text{ A g}^{-1}$  (B) in  $3 \text{ M KOH}$  solution. (C) The specific capacitances obtained from different charge-discharge current densities. (D) Nyquist plots of PPy-MOF- $x$  composites.
